# Supplementary material for: The heat shock protein family gene Hspa1l in male mice is dispensable for fertility
Source: PeerJ. 2020 Mar 23;8:e8702. doi: 10.7717/peerj.8702 (PMC7098389; doi:10.7717/peerj.8702)
Supplement: Data S1 [file peerj-08-8702-s004.xlsx]

## Sheet: Sheet1
	Hspa1l	18s	△Ct	2^△Ct	average
	Ct	Ct
heart	27.38	10.2196	-17.1605	6.82637e-06	5.65166e-06
heart	27.7796	10.3504	-17.4292	5.66614e-06
heart	28.181	10.4073	-17.7737	4.46246e-06
liver	29.0678	8.26476	-20.803	5.46605e-07	4.61948e-07
liver	29.573	8.37163	-21.2014	4.14719e-07
liver	29.5351	8.3674	-21.1677	4.24521e-07
spleen	29.3036	10.659	-18.6445	2.44025e-06	2.14545e-06
spleen	29.5621	10.5828	-18.9794	1.93483e-06
spleen	29.4562	10.5681	-18.888	2.06126e-06
lung	30.0629	9.72249	-20.3404	7.53212e-07	5.90814e-07
lung	30.4349	9.58368	-20.8512	5.28636e-07
lung	30.5532	9.59423	-20.959	4.90592e-07
kidney	27.716	9.42689	-18.2891	3.12207e-06	2.86614e-06
kidney	27.9792	9.36837	-18.6108	2.49792e-06
kidney	27.8398	9.4828	-18.357	2.97842e-06
brain	26.5901	9.46047	-17.1296	6.97372e-06	7.30946e-06
brain	26.7498	9.70948	-17.0404	7.4189e-06
brain	26.7212	9.70337	-17.0178	7.53576e-06
musle	27.5578	10.7853	-16.7724	8.93285e-06	9.14725e-06
musle	27.6029	10.7008	-16.9021	8.1649e-06
musle	27.4558	10.8949	-16.5608	1.0344e-05
testis	20.5262	9.61502	-10.9112	0.000519294	0.000468729
testis	20.6029	9.67886	-10.924	0.000514683
testis	20.7146	9.32303	-11.3916	0.000372211
