# Supplementary material for: The heat shock protein family gene Hspa1l in male mice is dispensable for fertility
Source: PeerJ. 2020 Mar 23;8:e8702. doi: 10.7717/peerj.8702 (PMC7098389; doi:10.7717/peerj.8702)
Supplement: Data S2 [file peerj-08-8702-s005.xlsx]

## Sheet: Sheet1
	Hspa1l	18s	△Ct	2^△Ct	average
1w	30.9807	11.7261	-19.2547	1.59872e-06	1.56056e-06
1w	31.1047	11.8133	-19.2914	1.55855e-06
1w	31.2708	11.9475	-19.3233	1.52441e-06
2w	31.6256	11.054	-20.5716	6.41696e-07	6.66773e-07
2w	31.7237	11.2697	-20.454	6.96183e-07
2w	31.6361	11.1104	-20.5257	6.62441e-07
3w	31.129	11.4579	-19.6711	1.19786e-06	1.39897e-06
3w	31.4274	11.8807	-19.5466	1.30581e-06
3w	31.1266	11.9548	-19.1718	1.69324e-06
4w	22.9577	9.11647	-13.8412	6.81361e-05	6.66255e-05
4w	23.1325	9.14586	-13.9867	6.1601e-05
4w	23.0569	9.25753	-13.7994	7.01395e-05
5w	25.0526	12.0053	-13.0473	0.000118132	0.000115838
5w	25.3013	12.1413	-13.16	0.000109255
5w	25.2022	12.1791	-13.0232	0.000120125
6w	25.6242	12.6861	-12.938	0.000127428	0.000129854
6w	25.6969	12.7443	-12.9526	0.000126149
6w	25.5958	12.7516	-12.8443	0.000135985
7w	25.1719	12.8552	-12.3167	0.000196016	0.000205876
7w	25.3498	13.0445	-12.3053	0.000197581
7w	25.2036	13.0796	-12.124	0.000224033
	Hspa1a	18s	△Ct	2^△Ct
1w	31.9972	11.7261	-20.2711	7.90285e-07	7.37874e-07
1w	32.4283	11.8133	-20.615	6.22676e-07
1w	32.1998	11.9475	-20.2523	8.00662e-07
2w	31.3441	11.054	-20.2901	7.79964e-07	8.56286e-07
2w	31.3613	11.2697	-20.0916	8.95025e-07
2w	31.2038	11.1104	-20.0934	8.9387e-07
3w	31.3323	11.4579	-19.8744	1.04043e-06	3.28794e-06
3w	29.6446	11.8807	-17.7639	4.49304e-06
3w	29.7719	11.9548	-17.8171	4.33034e-06
4w	25.2289	9.11647	-16.1124	1.41151e-05	1.37747e-05
4w	25.3261	9.14586	-16.1802	1.34669e-05
4w	25.4086	9.25753	-16.151	1.37423e-05
5w	29.2684	12.0053	-17.2631	6.35735e-06	6.41535e-06
5w	29.3833	12.1413	-17.242	6.45108e-06
5w	29.4241	12.1791	-17.245	6.43761e-06
6w	29.9322	12.6861	-17.2461	6.43292e-06	6.29989e-06
6w	29.984	12.7443	-17.2397	6.46131e-06
6w	30.0969	12.7516	-17.3453	6.00545e-06
7w	29.9259	12.8552	-17.0707	7.26458e-06	5.98159e-06
7w	30.5519	13.0445	-17.5074	5.36723e-06
7w	30.6016	13.0796	-17.5221	5.31296e-06
	Hspa1b	18s	△Ct	2^△Ct
1w	35.7302	11.7261	-24.0041	5.94343e-08	3.94777e-08
1w	36.6724	11.8133	-24.8591	3.28597e-08
1w	37.1368	11.9475	-25.1892	2.6139e-08
2w	36.2288	11.054	-25.1748	2.64016e-08	3.21148e-08
2w	35.9563	11.2697	-24.6866	3.70326e-08
2w	35.9673	11.1104	-24.8569	3.29101e-08
3w	38.7292	11.4579	-27.2713	6.1735e-09	#VALUE!
3w	Undetermined	11.8807	#VALUE!	#VALUE!
3w	Undetermined	11.9548	#VALUE!	#VALUE!
4w	34.3033	9.11647	-25.1868	2.61826e-08	3.05466e-08
4w	33.8938	9.14586	-24.7479	3.54919e-08
4w	34.2497	9.25753	-24.9921	2.99652e-08
5w	38.2357	12.0053	-26.2304	1.27016e-08	7.42584e-08
5w	36.5147	12.1413	-24.3735	4.60108e-08
5w	34.7183	12.1791	-22.5392	1.64063e-07
6w	Undetermined	12.6861	#VALUE!	#VALUE!	#VALUE!
6w	Undetermined	12.7443	#VALUE!	#VALUE!
6w	37.7779	12.7516	-25.0263	2.92632e-08
7w	Undetermined	12.8552	#VALUE!	#VALUE!	#VALUE!
7w	Undetermined	13.0445	#VALUE!	#VALUE!
7w	Undetermined	13.0796	#VALUE!	#VALUE!
