# Supplementary material for: The heat shock protein family gene Hspa1l in male mice is dispensable for fertility
Source: PeerJ. 2020 Mar 23;8:e8702. doi: 10.7717/peerj.8702 (PMC7098389; doi:10.7717/peerj.8702)
Supplement: Data S4 [file peerj-08-8702-s007.xlsx]

## Sheet: Sheet1
8w	BW	TW	T/B	TTEST	AVERAGE	SD
Hspa1l+/+-1	23.4	0.1674	0.00715385	0.262117	0.00735693	0.000204536
Hspa1l+/+-2	21.5	0.1623	0.00754884
Hspa1l+/+-3	24.1	0.1836	0.00761826
Hspa1l+/+-4	22.3	0.1631	0.0073139
Hspa1l+/+-5	24.7	0.1766	0.0071498
Hspa1l-/--1	23.6	0.1684	0.00713559		0.00726686	0.000160787
Hspa1l-/--2	22.8	0.1693	0.00742544
Hspa1l-/--3	24.2	0.1706	0.00704959
Hspa1l-/--4	23.8	0.1779	0.00747479
Hspa1l-/--5	22.1	0.1602	0.00724887
