# Supplementary material for: The heat shock protein family gene Hspa1l in male mice is dispensable for fertility
Source: PeerJ. 2020 Mar 23;8:e8702. doi: 10.7717/peerj.8702 (PMC7098389; doi:10.7717/peerj.8702)
Supplement: Data S5 [file peerj-08-8702-s008.xlsx]

## Sheet: Sheet1
8w	Total tubule	Apoptosis cells count	Apoptosis tubules	Apoptosis cells/Total tubule	everage	sd	TTEST	Apoptosis tubules/Total tubule	everage	sd	TTEST
Hspa1l+/+-1	266	28	18	0.105263			0.68662	0.0676692			0.986226
Hspa1l+/+-2	258	50	28	0.193798				0.108527
Hspa1l+/+-3	239	46	26	0.192469				0.108787
Hspa1l+/+-4	168	45	25	0.267857				0.14881
Hspa1l+/+-5	220	43	20	0.195455				0.0909091
Hspa1l-/--1	202	39	24	0.193069				0.118812
Hspa1l-/--2	218	30	17	0.137615				0.0779817
Hspa1l-/--3	216	53	19	0.24537				0.087963
Hspa1l-/--4	254	55	31	0.216535				0.122047
Hspa1l-/--5	249	57	29	0.228916				0.116466
