# Supplementary material for: The heat shock protein family gene Hspa1l in male mice is dispensable for fertility
Source: PeerJ. 2020 Mar 23;8:e8702. doi: 10.7717/peerj.8702 (PMC7098389; doi:10.7717/peerj.8702)
Supplement: Data S8 [file peerj-08-8702-s011.xlsx]

## Sheet: Sheet1
		Ct	Ct	△Ct	2^△Ct	average	ttest
		hspa1a	18s
Hspa1l+/+-1	hspa1a	27.0225	7.82754	-19.1949	1.66631e-06	2.2331e-06	8.21689e-07
Hspa1l+/+-1	hspa1a	26.7277	8.2815	-18.4462	2.79989e-06		0.00022858
Hspa1l+/+-2	hspa1a	26.5983	7.74992	-18.8484	2.11873e-06	2.753e-06	0.0122592
Hspa1l+/+-2	hspa1a	26.3821	8.21066	-18.1714	3.38726e-06
Hspa1l+/+-3	hspa1a	26.4051	7.91622	-18.4889	2.71824e-06	2.76335e-06
Hspa1l+/+-3	hspa1a	26.6333	8.19154	-18.4418	2.80845e-06
Hspa1l+/+-4	hspa1a	26.5609	7.77237	-18.7886	2.20838e-06	2.44474e-06
Hspa1l+/+-4	hspa1a	26.4496	7.94086	-18.5087	2.68109e-06
Hspa1l+/+-5	hspa1a	26.7263	7.89869	-18.8276	2.14946e-06	2.14574e-06
Hspa1l+/+-5	hspa1a	26.6252	7.79262	-18.8326	2.14203e-06
Heat-Hspa1l+/+-1	hspa1a	24.2117	7.88888	-16.3228	1.21997e-05	1.18322e-05
Heat-Hspa1l+/+-1	hspa1a	24.2595	7.84709	-16.4124	1.14647e-05
Heat-Hspa1l+/+-2	hspa1a	24.4369	7.96305	-16.4738	1.09871e-05	1.14868e-05
Heat-Hspa1l+/+-2	hspa1a	24.6309	8.28269	-16.3482	1.19865e-05
Heat-Hspa1l+/+-3	hspa1a	24.2288	7.14336	-17.0855	7.1905e-06	8.85997e-06
Heat-Hspa1l+/+-3	hspa1a	24.2246	7.68942	-16.5352	1.05294e-05
Heat-Hspa1l+/+-4	hspa1a	24.2848	7.661	-16.6238	9.90216e-06	9.72784e-06
Heat-Hspa1l+/+-4	hspa1a	24.5257	7.85015	-16.6755	9.55353e-06
Heat-Hspa1l+/+-5	hspa1a	23.8549	7.63619	-16.2188	1.3112e-05	1.15721e-05
Heat-Hspa1l+/+-5	hspa1a	24.246	7.64104	-16.605	1.00322e-05
Hspa1l-/--1	hspa1a	26.0409	7.68454	-18.3563	2.97983e-06	3.22057e-06	8.2846e-08
Hspa1l-/--1	hspa1a	26.0996	7.95937	-18.1402	3.46132e-06
Hspa1l-/--2	hspa1a	25.1894	7.57977	-17.6096	5.00014e-06	3.21825e-06
Hspa1l-/--2	hspa1a	27.3127	7.90352	-19.4091	1.43636e-06
Hspa1l-/--3	hspa1a	26.0644	7.30804	-18.7564	2.25827e-06	2.93495e-06
Hspa1l-/--3	hspa1a	26.049	7.97005	-18.0789	3.61163e-06
Hspa1l-/--4	hspa1a	25.8311	7.30589	-18.5252	2.65069e-06	2.85421e-06
Hspa1l-/--4	hspa1a	26.198	7.8789	-18.3191	3.05774e-06
Hspa1l-/--5	hspa1a	25.8636	7.17958	-18.684	2.37438e-06	4.02056e-06
Hspa1l-/--5	hspa1a	25.6696	8.24056	-17.4291	5.66673e-06
Heat-Hspa1l-/--1	hspa1a	23.5699	7.78316	-15.7867	1.769e-05	1.79912e-05
Heat-Hspa1l-/--1	hspa1a	23.4766	7.73823	-15.7384	1.82924e-05
Heat-Hspa1l-/--2	hspa1a	23.4236	7.54522	-15.8784	1.66012e-05	1.68206e-05
Heat-Hspa1l-/--2	hspa1a	23.4621	7.62142	-15.8407	1.704e-05
Heat-Hspa1l-/--3	hspa1a	23.3375	7.38401	-15.9535	1.57586e-05	1.39882e-05
Heat-Hspa1l-/--3	hspa1a	23.4618	7.1411	-16.3207	1.22178e-05
Heat-Hspa1l-/--4	hspa1a	23.3351	7.29884	-16.0363	1.48802e-05	1.60575e-05
Heat-Hspa1l-/--4	hspa1a	23.4468	7.62248	-15.8243	1.72348e-05
Heat-Hspa1l-/--5	hspa1a	23.2406	7.39434	-15.8463	1.69744e-05	1.73754e-05
Heat-Hspa1l-/--5	hspa1a	23.4323	7.65259	-15.7797	1.77765e-05
		hspa1b	18s
Hspa1l+/+-1	hspa1b	34.3186	7.82754	-26.491	1.06025e-08	1.12408e-08	0.000516491
Hspa1l+/+-1	hspa1b	34.6085	8.2815	-26.327	1.18791e-08		0.491784
Hspa1l+/+-2	hspa1b	33.9067	7.74992	-26.1568	1.33668e-08	1.46344e-08	0.0244378
Hspa1l+/+-2	hspa1b	34.1169	8.21066	-25.9062	1.59021e-08
Hspa1l+/+-3	hspa1b	34.1023	7.91622	-26.1861	1.30979e-08	3.04138e-08
Hspa1l+/+-3	hspa1b	32.5121	8.19154	-24.3205	4.77296e-08
Hspa1l+/+-4	hspa1b	33.1065	7.77237	-25.3341	2.36413e-08	1.64052e-08
Hspa1l+/+-4	hspa1b	34.6415	7.94086	-26.7006	9.16899e-09
Hspa1l+/+-5	hspa1b	33.6898	7.89869	-25.7911	1.72232e-08	1.37486e-08
Hspa1l+/+-5	hspa1b	34.329	7.79262	-26.5364	1.0274e-08
Heat-Hspa1l+/+-1	hspa1b	28.7819	7.88888	-20.893	5.13549e-07	6.30339e-07
Heat-Hspa1l+/+-1	hspa1b	28.1992	7.84709	-20.3521	7.4713e-07
Heat-Hspa1l+/+-2	hspa1b	28.2402	7.96305	-20.2772	7.86984e-07	8.94771e-07
Heat-Hspa1l+/+-2	hspa1b	28.2106	8.28269	-19.9279	1.00256e-06
Heat-Hspa1l+/+-3	hspa1b	29.2821	7.14336	-22.1387	2.16566e-07	3.19704e-07
Heat-Hspa1l+/+-3	hspa1b	28.8628	7.68942	-21.1734	4.22842e-07
Heat-Hspa1l+/+-4	hspa1b	28.4112	7.661	-20.7502	5.66966e-07	4.47212e-07
Heat-Hspa1l+/+-4	hspa1b	29.3923	7.85015	-21.5422	3.27458e-07
Heat-Hspa1l+/+-5	hspa1b	28.2021	7.63619	-20.5659	6.44244e-07	5.15892e-07
Heat-Hspa1l+/+-5	hspa1b	28.9402	7.64104	-21.2992	3.8754e-07
Hspa1l-/--1	hspa1b	34.7673	7.68454	-27.0828	7.03522e-09	6.16241e-09	1.71834e-07
Hspa1l-/--1	hspa1b	35.4536	7.95937	-27.4942	5.28961e-09
Hspa1l-/--2	hspa1b	34.363	7.57977	-26.7832	8.6585e-09	7.17473e-09
Hspa1l-/--2	hspa1b	35.2922	7.90352	-27.3887	5.69097e-09
Hspa1l-/--3	hspa1b	34.3916	7.30804	-27.0836	7.03113e-09	7.55609e-09
Hspa1l-/--3	hspa1b	34.8529	7.97005	-26.8828	8.08106e-09
Hspa1l-/--4	hspa1b	34.4775	7.30589	-27.1716	6.61497e-09	6.37165e-09
Hspa1l-/--4	hspa1b	35.1608	7.8789	-27.2819	6.12834e-09
Hspa1l-/--5	hspa1b	34.1804	7.17958	-27.0009	7.44616e-09	1.08895e-08
Hspa1l-/--5	hspa1b	34.2967	8.24056	-26.0561	1.43329e-08
Heat-Hspa1l-/--1	hspa1b	28.107	7.78316	-20.3239	7.6192e-07	6.36494e-07
Heat-Hspa1l-/--1	hspa1b	28.6382	7.73823	-20.9	5.11067e-07
Heat-Hspa1l-/--2	hspa1b	28.2043	7.54522	-20.6591	6.0393e-07	6.2247e-07
Heat-Hspa1l-/--2	hspa1b	28.1946	7.62142	-20.5731	6.41011e-07
Heat-Hspa1l-/--3	hspa1b	27.9891	7.38401	-20.605	6.26993e-07	5.04648e-07
Heat-Hspa1l-/--3	hspa1b	28.4599	7.1411	-21.3188	3.82304e-07
Heat-Hspa1l-/--4	hspa1b	27.7684	7.29884	-20.4696	6.88714e-07	7.18346e-07
Heat-Hspa1l-/--4	hspa1b	27.973	7.62248	-20.3505	7.47979e-07
Heat-Hspa1l-/--5	hspa1b	27.5144	7.39434	-20.1201	8.77525e-07	7.02014e-07
Heat-Hspa1l-/--5	hspa1b	28.5097	7.65259	-20.8571	5.26502e-07
		hspa1l	18s
Hspa1l+/+-1	hspa1l	22.2783	7.82754	-14.4507	4.46579e-05	5.27695e-05	0.0976444
Hspa1l+/+-1	hspa1l	22.2851	8.2815	-14.0036	6.08812e-05		1.05036e-06
Hspa1l+/+-2	hspa1l	21.9977	7.74992	-14.2477	5.14046e-05	5.56866e-05	3.78229e-12
Hspa1l+/+-2	hspa1l	22.2361	8.21066	-14.0254	5.99687e-05
Hspa1l+/+-3	hspa1l	22.0653	7.91622	-14.149	5.50446e-05	5.52152e-05
Hspa1l+/+-3	hspa1l	22.3317	8.19154	-14.1401	5.53858e-05
Hspa1l+/+-4	hspa1l	21.8875	7.77237	-14.1152	5.6352e-05	5.61535e-05
Hspa1l+/+-4	hspa1l	22.0662	7.94086	-14.1254	5.5955e-05
Hspa1l+/+-5	hspa1l	21.9074	7.89869	-14.0087	6.0667e-05	5.19068e-05
Hspa1l+/+-5	hspa1l	22.293	7.79262	-14.5004	4.31466e-05
Heat-Hspa1l+/+-1	hspa1l	22.1148	7.88888	-14.2259	5.21896e-05	5.11197e-05
Heat-Hspa1l+/+-1	hspa1l	22.1334	7.84709	-14.2863	5.00498e-05
Heat-Hspa1l+/+-2	hspa1l	22.1735	7.96305	-14.2105	5.27506e-05	5.47383e-05
Heat-Hspa1l+/+-2	hspa1l	22.3883	8.28269	-14.1056	5.67259e-05
Heat-Hspa1l+/+-3	hspa1l	21.6978	7.14336	-14.5545	4.15598e-05	4.78222e-05
Heat-Hspa1l+/+-3	hspa1l	21.8638	7.68942	-14.1744	5.40846e-05
Heat-Hspa1l+/+-4	hspa1l	21.8343	7.661	-14.1733	5.41269e-05	5.44385e-05
Heat-Hspa1l+/+-4	hspa1l	22.0069	7.85015	-14.1568	5.47502e-05
Heat-Hspa1l+/+-5	hspa1l	21.731	7.63619	-14.0948	5.71548e-05	5.28098e-05
Heat-Hspa1l+/+-5	hspa1l	21.9737	7.64104	-14.3327	4.84648e-05
Hspa1l-/--1	hspa1l	34.5474	7.68454	-26.8629	8.19351e-09	8.93512e-09	4.91839e-06
Hspa1l-/--1	hspa1l	34.5822	7.95937	-26.6228	9.67672e-09
Hspa1l-/--2	hspa1l	35.3355	7.57977	-27.7557	4.41256e-09	4.0542e-09
Hspa1l-/--2	hspa1l	35.915	7.90352	-28.0115	3.69583e-09
Hspa1l-/--3	hspa1l	33.4523	7.30804	-26.1442	1.34834e-08	1.64254e-08
Hspa1l-/--3	hspa1l	33.5919	7.97005	-25.6218	1.93673e-08
Hspa1l-/--4	hspa1l	35.8346	7.30589	-28.5287	2.58225e-09	4.19662e-08
Hspa1l-/--4	hspa1l	31.4302	7.8789	-23.5513	8.13501e-08
Hspa1l-/--5	hspa1l	34.0476	7.17958	-26.868	8.16434e-09	1.46106e-08
Hspa1l-/--5	hspa1l	33.7417	8.24056	-25.5011	2.10569e-08
Heat-Hspa1l-/--1	hspa1l	29.7811	7.78316	-21.998	2.38754e-07	2.30508e-07
Heat-Hspa1l-/--1	hspa1l	29.8395	7.73823	-22.1012	2.22262e-07
Heat-Hspa1l-/--2	hspa1l	29.7473	7.54522	-22.2021	2.07257e-07	2.10084e-07
Heat-Hspa1l-/--2	hspa1l	29.7847	7.62142	-22.1632	2.12911e-07
Heat-Hspa1l-/--3	hspa1l	29.5596	7.38401	-22.1756	2.11094e-07	2.13577e-07
Heat-Hspa1l-/--3	hspa1l	29.2832	7.1411	-22.1421	2.16061e-07
Heat-Hspa1l-/--4	hspa1l	29.2817	7.29884	-21.9828	2.41272e-07	2.47713e-07
Heat-Hspa1l-/--4	hspa1l	29.5303	7.62248	-21.9078	2.54154e-07
Heat-Hspa1l-/--5	hspa1l	29.2979	7.39434	-21.9035	2.54907e-07	2.55211e-07
Heat-Hspa1l-/--5	hspa1l	29.5527	7.65259	-21.9001	2.55515e-07
		hspa2
Hspa1l+/+-1	hspa2	21.3532	7.82754	-13.5257	8.47944e-05	9.84842e-05	0.849551
Hspa1l+/+-1	hspa2	21.4035	8.2815	-13.122	0.000112174		0.262577
Hspa1l+/+-2	hspa2	21.1409	7.74992	-13.391	9.30891e-05	9.0235e-05	0.0358292
Hspa1l+/+-2	hspa2	21.693	8.21066	-13.4823	8.73809e-05
Hspa1l+/+-3	hspa2	21.1585	7.91622	-13.2423	0.000103198	0.000100502
Hspa1l+/+-3	hspa2	21.5113	8.19154	-13.3197	9.78062e-05
Hspa1l+/+-4	hspa2	21.0216	7.77237	-13.2492	0.000102704	9.52223e-05
Hspa1l+/+-4	hspa2	21.4173	7.94086	-13.4764	8.77408e-05
Hspa1l+/+-5	hspa2	21.1334	7.89869	-13.2347	0.000103742	8.13582e-05
Hspa1l+/+-5	hspa2	21.8422	7.79262	-14.0495	5.89747e-05
Heat-Hspa1l+/+-1	hspa2	20.7999	7.88888	-12.911	0.000129839	9.38474e-05
Heat-Hspa1l+/+-1	hspa2	21.9243	7.84709	-14.0772	5.78555e-05
Heat-Hspa1l+/+-2	hspa2	20.5401	7.96305	-12.5771	0.000163652	0.000106394
Heat-Hspa1l+/+-2	hspa2	22.5955	8.28269	-14.3129	4.91362e-05
Heat-Hspa1l+/+-3	hspa2	21.292	7.14336	-14.1487	5.5058e-05	7.07644e-05
Heat-Hspa1l+/+-3	hspa2	21.1869	7.68942	-13.4974	8.64709e-05
Heat-Hspa1l+/+-4	hspa2	20.8669	7.661	-13.2059	0.000105833	9.47292e-05
Heat-Hspa1l+/+-4	hspa2	21.3958	7.85015	-13.5457	8.36256e-05
Heat-Hspa1l+/+-5	hspa2	20.8985	7.63619	-13.2623	0.000101778	9.34752e-05
Heat-Hspa1l+/+-5	hspa2	21.1603	7.64104	-13.5193	8.51726e-05
Hspa1l-/--1	hspa2	21.1081	7.68454	-13.4235	9.10153e-05	0.000107467	0.268239
Hspa1l-/--1	hspa2	20.9377	7.95937	-12.9783	0.000123919
Hspa1l-/--2	hspa2	20.7379	7.57977	-13.1581	0.000109398	0.000105779
Hspa1l-/--2	hspa2	21.1604	7.90352	-13.2569	0.00010216
Hspa1l-/--3	hspa2	20.8762	7.30804	-13.5682	8.23335e-05	0.000102504
Hspa1l-/--3	hspa2	20.9629	7.97005	-12.9929	0.000122675
Hspa1l-/--4	hspa2	20.7612	7.30589	-13.4553	8.90316e-05	9.9959e-05
Hspa1l-/--4	hspa2	21.0175	7.8789	-13.1386	0.000110886
Hspa1l-/--5	hspa2	20.9002	7.17958	-13.7207	7.40743e-05	0.000129659
Hspa1l-/--5	hspa2	20.6388	8.24056	-12.3983	0.000185244
Heat-Hspa1l-/--1	hspa2	20.9087	7.78316	-13.1255	0.000111897	0.000111293
Heat-Hspa1l-/--1	hspa2	20.8794	7.73823	-13.1412	0.000110688
Heat-Hspa1l-/--2	hspa2	20.773	7.54522	-13.2278	0.000104241	0.000105031
Heat-Hspa1l-/--2	hspa2	20.8275	7.62142	-13.2061	0.000105821
Heat-Hspa1l-/--3	hspa2	20.7984	7.38401	-13.4144	9.15928e-05	8.41749e-05
Heat-Hspa1l-/--3	hspa2	20.8104	7.1411	-13.6693	7.6757e-05
Heat-Hspa1l-/--4	hspa2	20.7451	7.29884	-13.4463	8.95927e-05	9.90601e-05
Heat-Hspa1l-/--4	hspa2	20.7921	7.62248	-13.1697	0.000108528
Heat-Hspa1l-/--5	hspa2	20.6561	7.39434	-13.2618	0.000101816	0.000104127
Heat-Hspa1l-/--5	hspa2	20.8503	7.65259	-13.1977	0.000106438
