# Supplementary material for: The heat shock protein family gene Hspa1l in male mice is dispensable for fertility
Source: PubMed Central journal article supplement (PMC7098389; doi:10.7717/peerj.8702), 2020-03-23
Supplement: peerj-08-8702-s019.pdf [file peerj-08-8702-s019.pdf]

PVDF

Marker Heart Liver Spleen Lung Kidney Brain Muscle Testis Marker

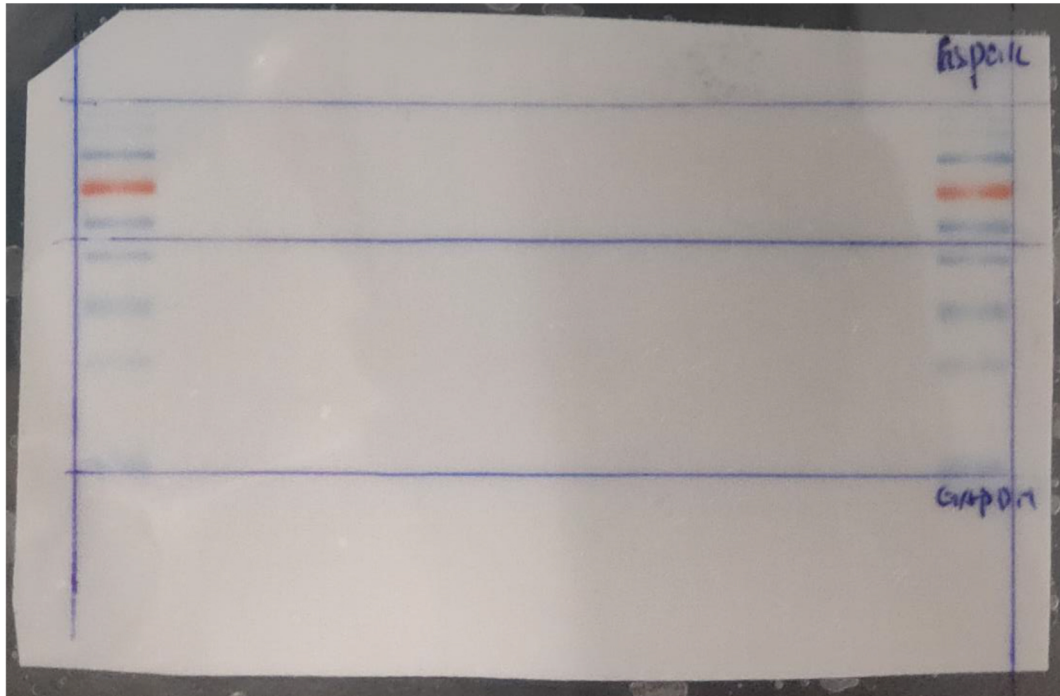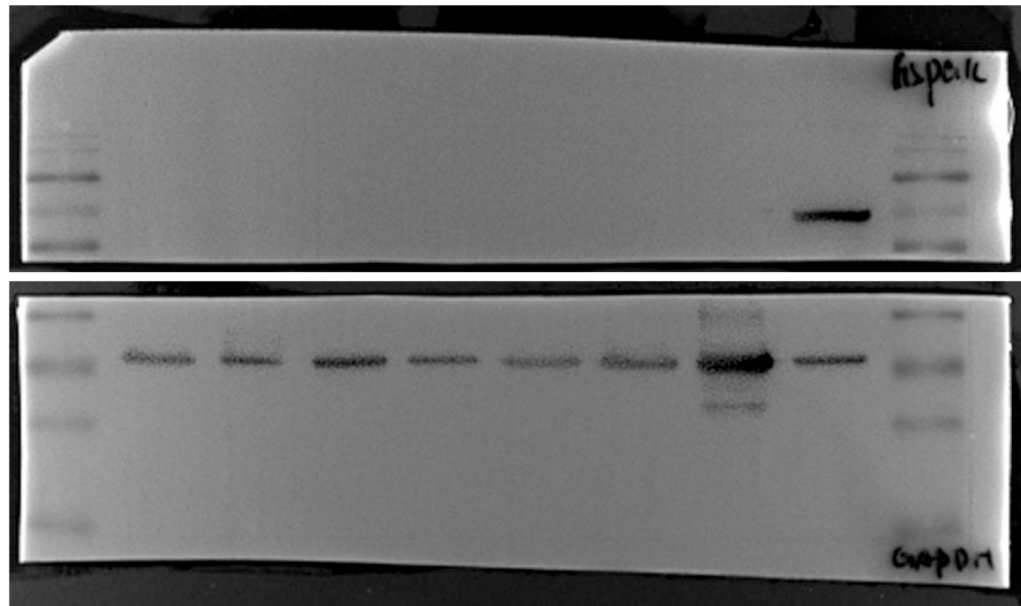

— HSPA1L

— GAPDH
