# Supplementary material for: The heat shock protein family geneHspa1lin male mice is dispensable for fertility
Source: PeerJ journal article supplement (doi:10.7717/peerj.8702), 2020-03-23

Marker WT HOM —

406bp—  
281bp—

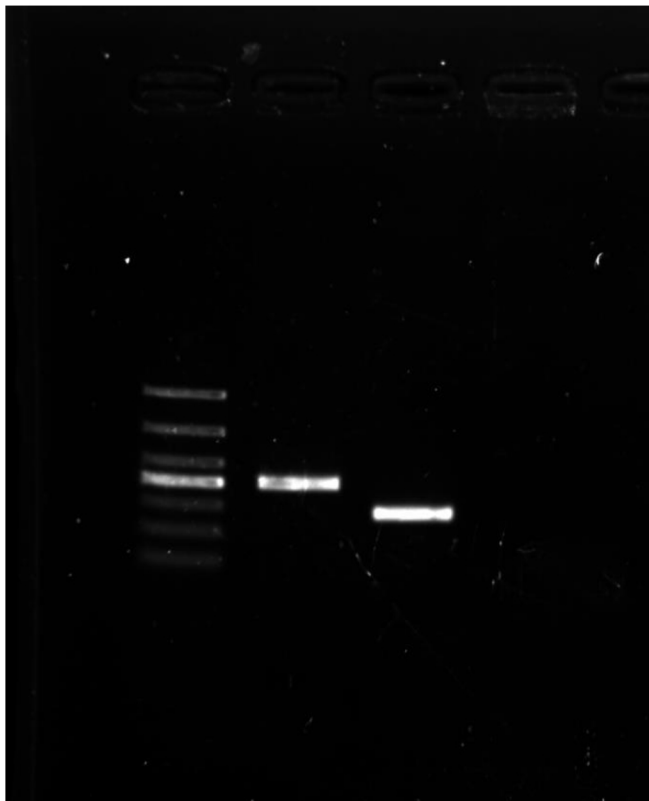

Supplement: Raw_data_for_PCR_of_Figure_2C.pdf [file Raw_data_for_PCR_of_Figure_2C.pdf]
