# Supplementary material for: The heat shock protein family geneHspa1lin male mice is dispensable for fertility
Source: PeerJ journal article supplement (doi:10.7717/peerj.8702), 2020-03-23
Supplement: Raw_data_for_WB_of_Figure_2D.pdf [file Raw_data_for_WB_of_Figure_2D.pdf]

PVDF

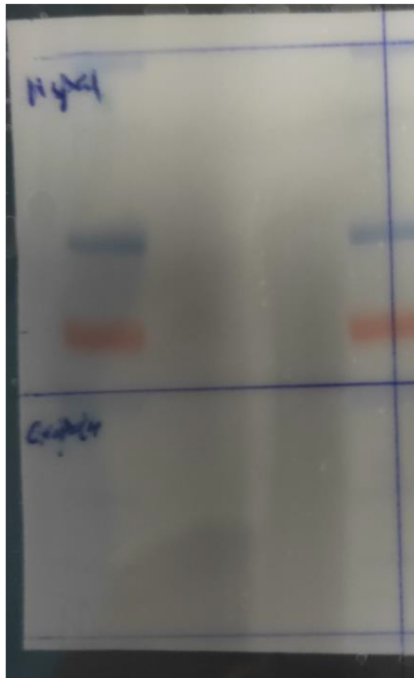

Marker WT HOM

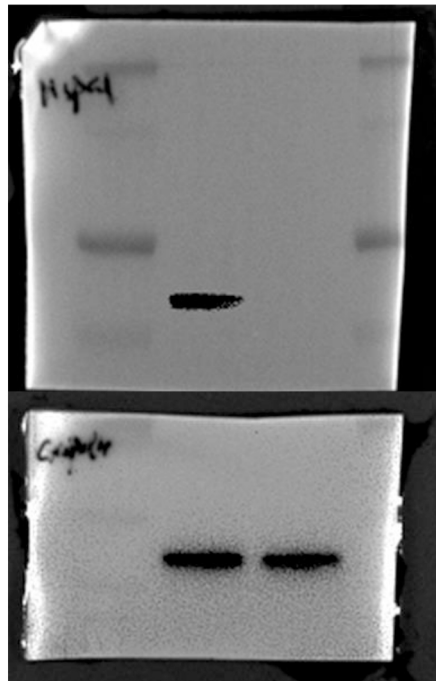

— HSPA1L

— GAPDH
