# Supplementary material for: The heat shock protein family geneHspa1lin male mice is dispensable for fertility
Source: PeerJ journal article supplement (doi:10.7717/peerj.8702), 2020-03-23

PVDF

Marker WT Heat-WT HOM Heat-HOM  
1 2 3 1 2 3 1 2 3 1 2 3

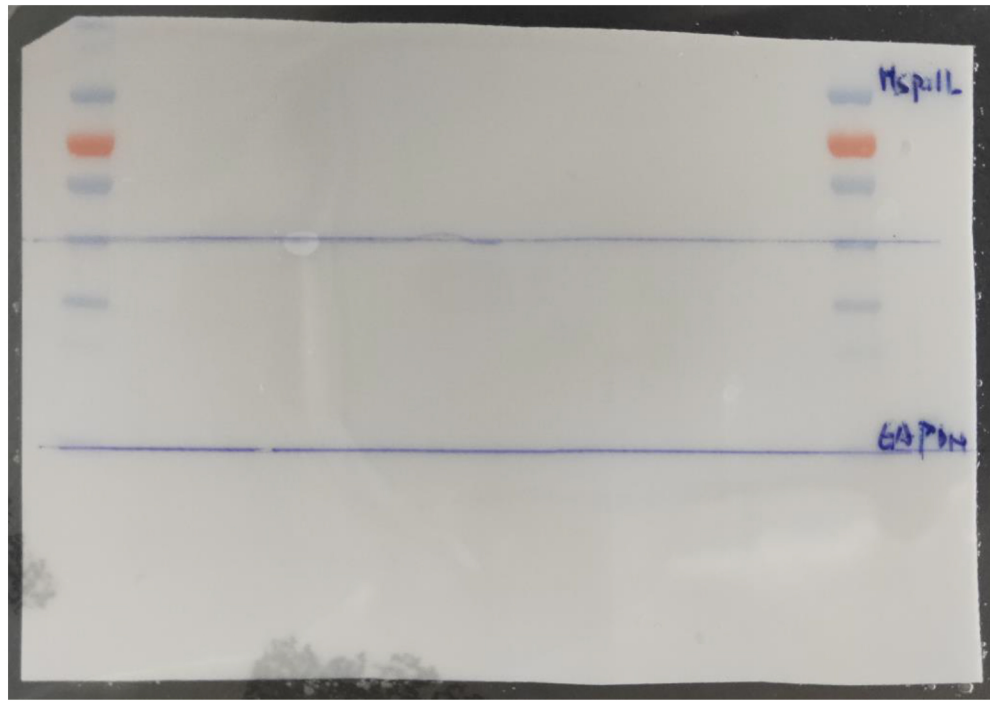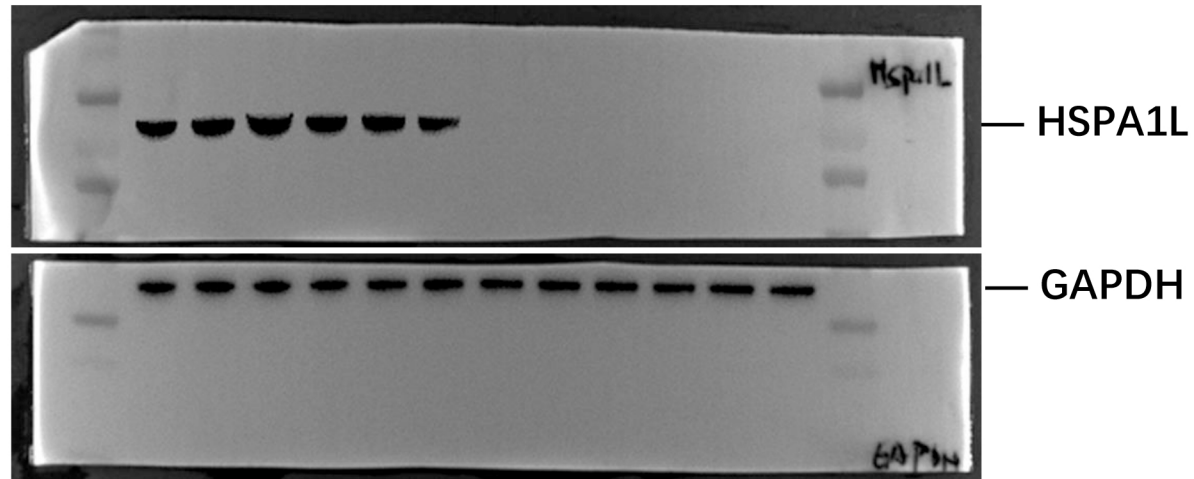

Supplement: Raw_data_for_WB_of_Figure_6B.pdf [file Raw_data_for_WB_of_Figure_6B.pdf]
