# Supplementary material for: The heat shock protein family geneHspa1lin male mice is dispensable for fertility
Source: PeerJ journal article supplement (doi:10.7717/peerj.8702), 2020-03-23
Supplement: Supplementary_Figure1.pdf [file Supplementary_Figure1.pdf]

Heart Liver Spleen Lung Kidney Brain Muscle Testis

HSPA1L

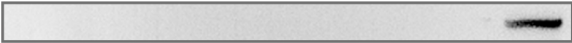

-70kD

GAPDH

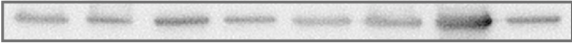

-35kD
