# Supplementary material for: The heat shock protein family geneHspa1lin male mice is dispensable for fertility
Source: PeerJ journal article supplement (doi:10.7717/peerj.8702), 2020-03-23

Hspa5

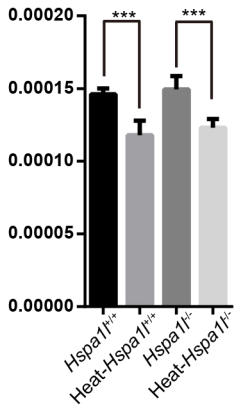

Hspa8

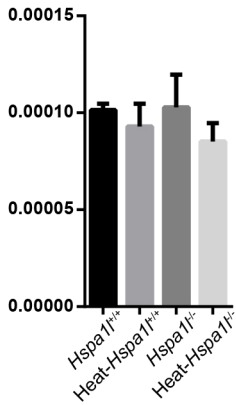

Hspa9

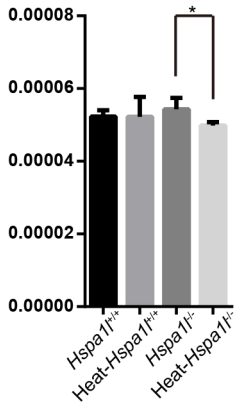

Hspa12a

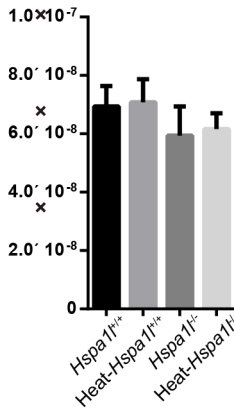

Hspa12b

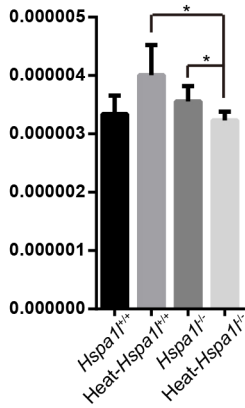

Hspa13

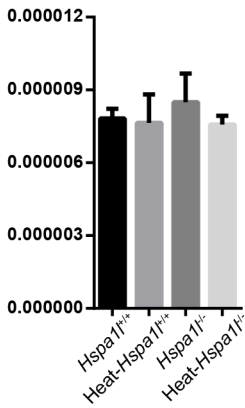

Supplement: Supplementary_Figure2.pdf [file Supplementary_Figure2.pdf]
