# Supplementary material for: The heat shock protein family geneHspa1lin male mice is dispensable for fertility
Source: PeerJ journal article supplement (doi:10.7717/peerj.8702), 2020-03-23
Supplement: Supplementary_Figure_3.pdf [file Supplementary_Figure_3.pdf]

*Hspa1l*<sup>+/+</sup> Heat-*Hspa1l*<sup>+/+</sup> *Hspa1l*<sup>-/-</sup> Heat-*Hspa1l*<sup>-/-</sup>

4

5

4

5

4

5

4

5

HSPA1L

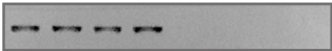

— 70kD

GAPDH

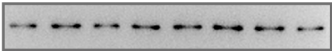

— 35kD
