# Supplementary material for: The heat shock protein family gene Hspa1l in male mice is dispensable for fertility
Source: PeerJ. 2020 Mar 23;8:e8702. doi: 10.7717/peerj.8702 (PMC7098389; doi:10.7717/peerj.8702)
Supplement: Table S1 [file peerj-08-8702-s021.xlsx]

## Sheet: Sheet1
Table S1. List of Antibodies
Antibodies	SOURCE	IDENTIFIER
Rabbit polyclonal anti-HSPA1L	Proteintech, Rosemont, PA, USA	Cat#13970-1-AP
Mouse monoclonal anti-Acetylated Tubulin	Sigma, St.Louis, MO, USA	Cat#T7451
Rabbit polyclonal anti-SOX9	Millipore, Billerica, MA, USA	Cat#AB5535
Rabbit polyclonal anti-gamma H2A.X (phospho S139)	Abcam, Cambridge, MA, USA	Cat#ab2893
Goat polyclonal anti-PLZF	RnD Systems, Minneapolis, MN,USA	Cat#AF2944
Donkey anti-Mouse IgG, Alexa Fluor 488	Invitrogen, Carlsbad, CA, USA	Cat#A-21202
Donkey anti-Rabbit IgG, Alexa Fluor 488	Invitrogen, Carlsbad, CA, USA	Cat#A-21206
Cy3-AffiniPure Donkey Anti-Goat	Jackson, West Grove, PA,USA	Cat#705-165-147
