# Supplementary material for: The heat shock protein family gene Hspa1l in male mice is dispensable for fertility
Source: PeerJ. 2020 Mar 23;8:e8702. doi: 10.7717/peerj.8702 (PMC7098389; doi:10.7717/peerj.8702)
Supplement: Table S2 [file peerj-08-8702-s022.xlsx]

## Sheet: Sheet1
Table S2. Primer sequences
Primer	Sequence
Hspa1l-F	TCACGGTGCCAGCCTATTTC
Hspa1l-R	CGTGGGCTCATTGATTATTCTCA
Hspa2-F	GCGTGGGGGTATTCCAACAT
Hspa2-R	TGAGACGCTCGGTGTCAGT
Hspa1a-F	TGGTGCAGTCCGACATGAAG
Hspa1a-R	GCTGAGAGTCGTTGAAGTAGGC
Hspa1b-F	GAGATCGACTCTCTGTTCGAGG
Hspa1b-R	GCCCGTTGAAGAAGTCCTG
